# Supplementary material for: Plocabulin, a novel tubulin-binding agent, inhibits angiogenesis by modulation of microtubule dynamics in endothelial cells
Source: Springer Nature journal article supplement (doi:10.1186/s12885-018-4086-2), 2018-02-07
Supplement: MOESM3 [file 15445864]

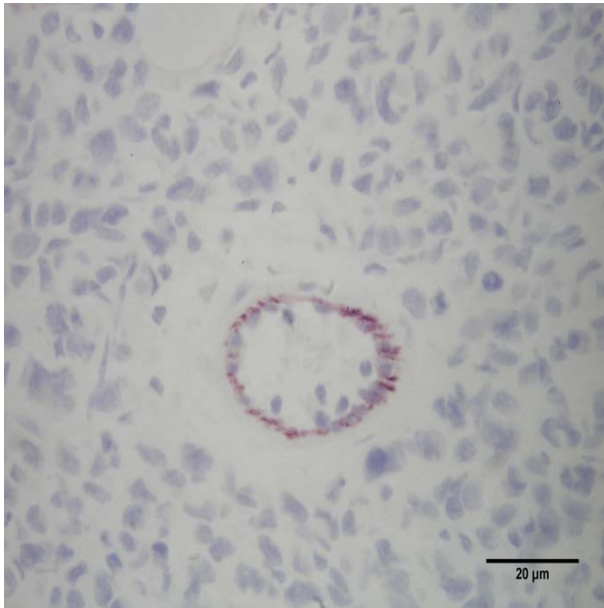

Placebo 100x

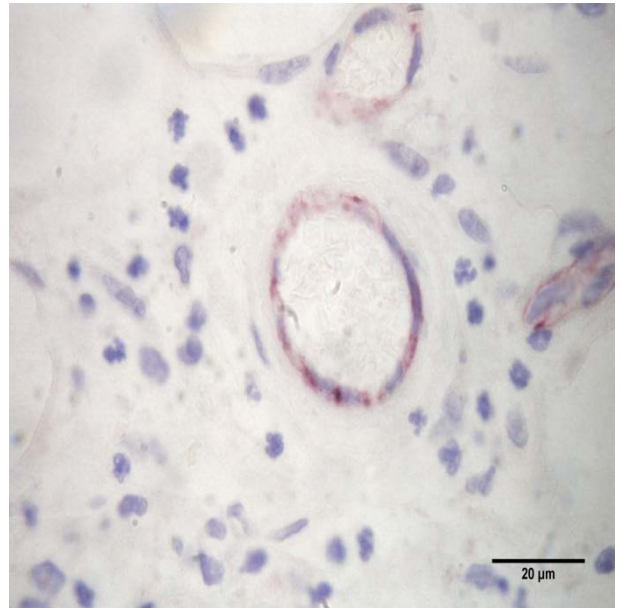

Plocabulin 100x

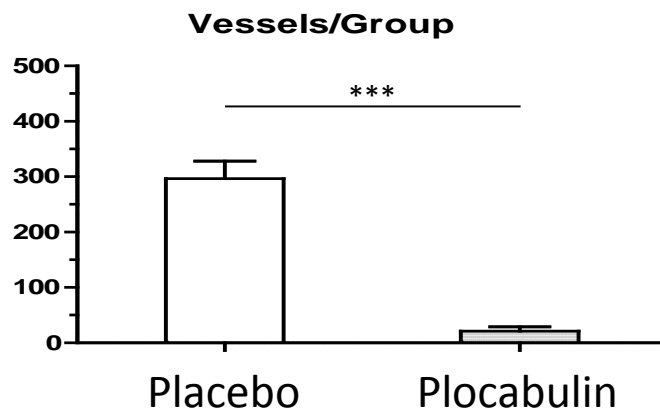

Figure S2
